# Supplementary material for: Even-skipped homeobox 1 is frequently hypermethylated in prostate cancer and predicts PSA recurrence
Source: PubMed Central journal article supplement — Br J Cancer. 2012 May 17;107(1):100–7. doi: 10.1038/bjc.2012.216 (PMC3389415; doi:10.1038/bjc.2012.216), 2012-05-17

Supplemental Table 1. Patient characteristics from MethyLight analysis

|          | Non-Tumor Associated (NTA) | Tumor and Tumor Associated (T and TA) |
|----------|----------------------------|---------------------------------------|
| Number   | 11                         | 35                                    |
| Mean Age | 59                         | 59                                    |
| Mean PSA | -                          | 8.3                                   |
| Gleason  |                            |                                       |
| 3+3      | -                          | 5                                     |
| 3+4      | -                          | 14                                    |
| 3+5      | -                          | 1                                     |
| 4+3      | -                          | 1                                     |
| 4+4      | -                          | 3                                     |
| 4+5      | -                          | 9                                     |
| 5+5      | -                          | 1                                     |
| Stage    | -                          |                                       |
| T2a      | -                          | 1                                     |
| T2b      | -                          | 1                                     |
| T2c      | -                          | 15                                    |
| T3a      | -                          | 3                                     |
| T3b      | -                          | 6                                     |

**Supplementary Figure 1.** Performance of the MethyLight assay for *Evx1* methylation. DNA mixing of methylated LNCaP and unmethylated kidney DNA was performed. LNCaP and kidney was given theoretical methylation values of 100% and 0%, respectively, and plotted against actual methylation measured by MethyLight.

**Supplemental Figure 1**

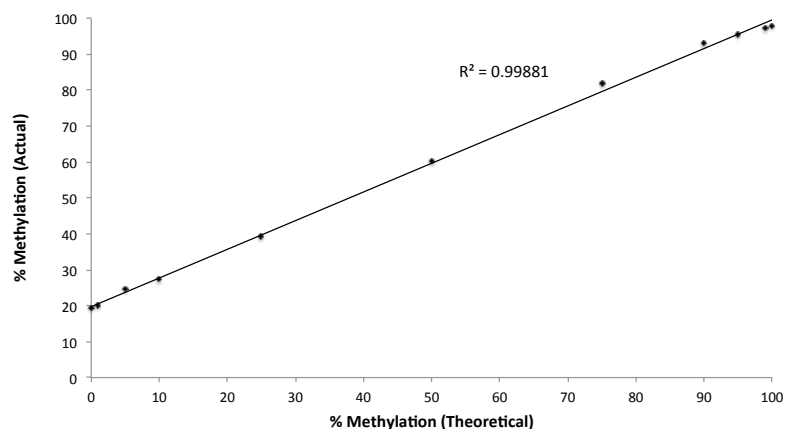

Supplement: bjc2012216x1.pdf [file bjc2012216x1.pdf]
